# Supplementary figures and images for: Efficient Synthesis and Anti-Tubercular Activity of a Series of Spirocycles: An Exercise in Open Science
Source: PLOS journal article supplement (doi:10.1371/journal.pone.0111782), 2014-12-10

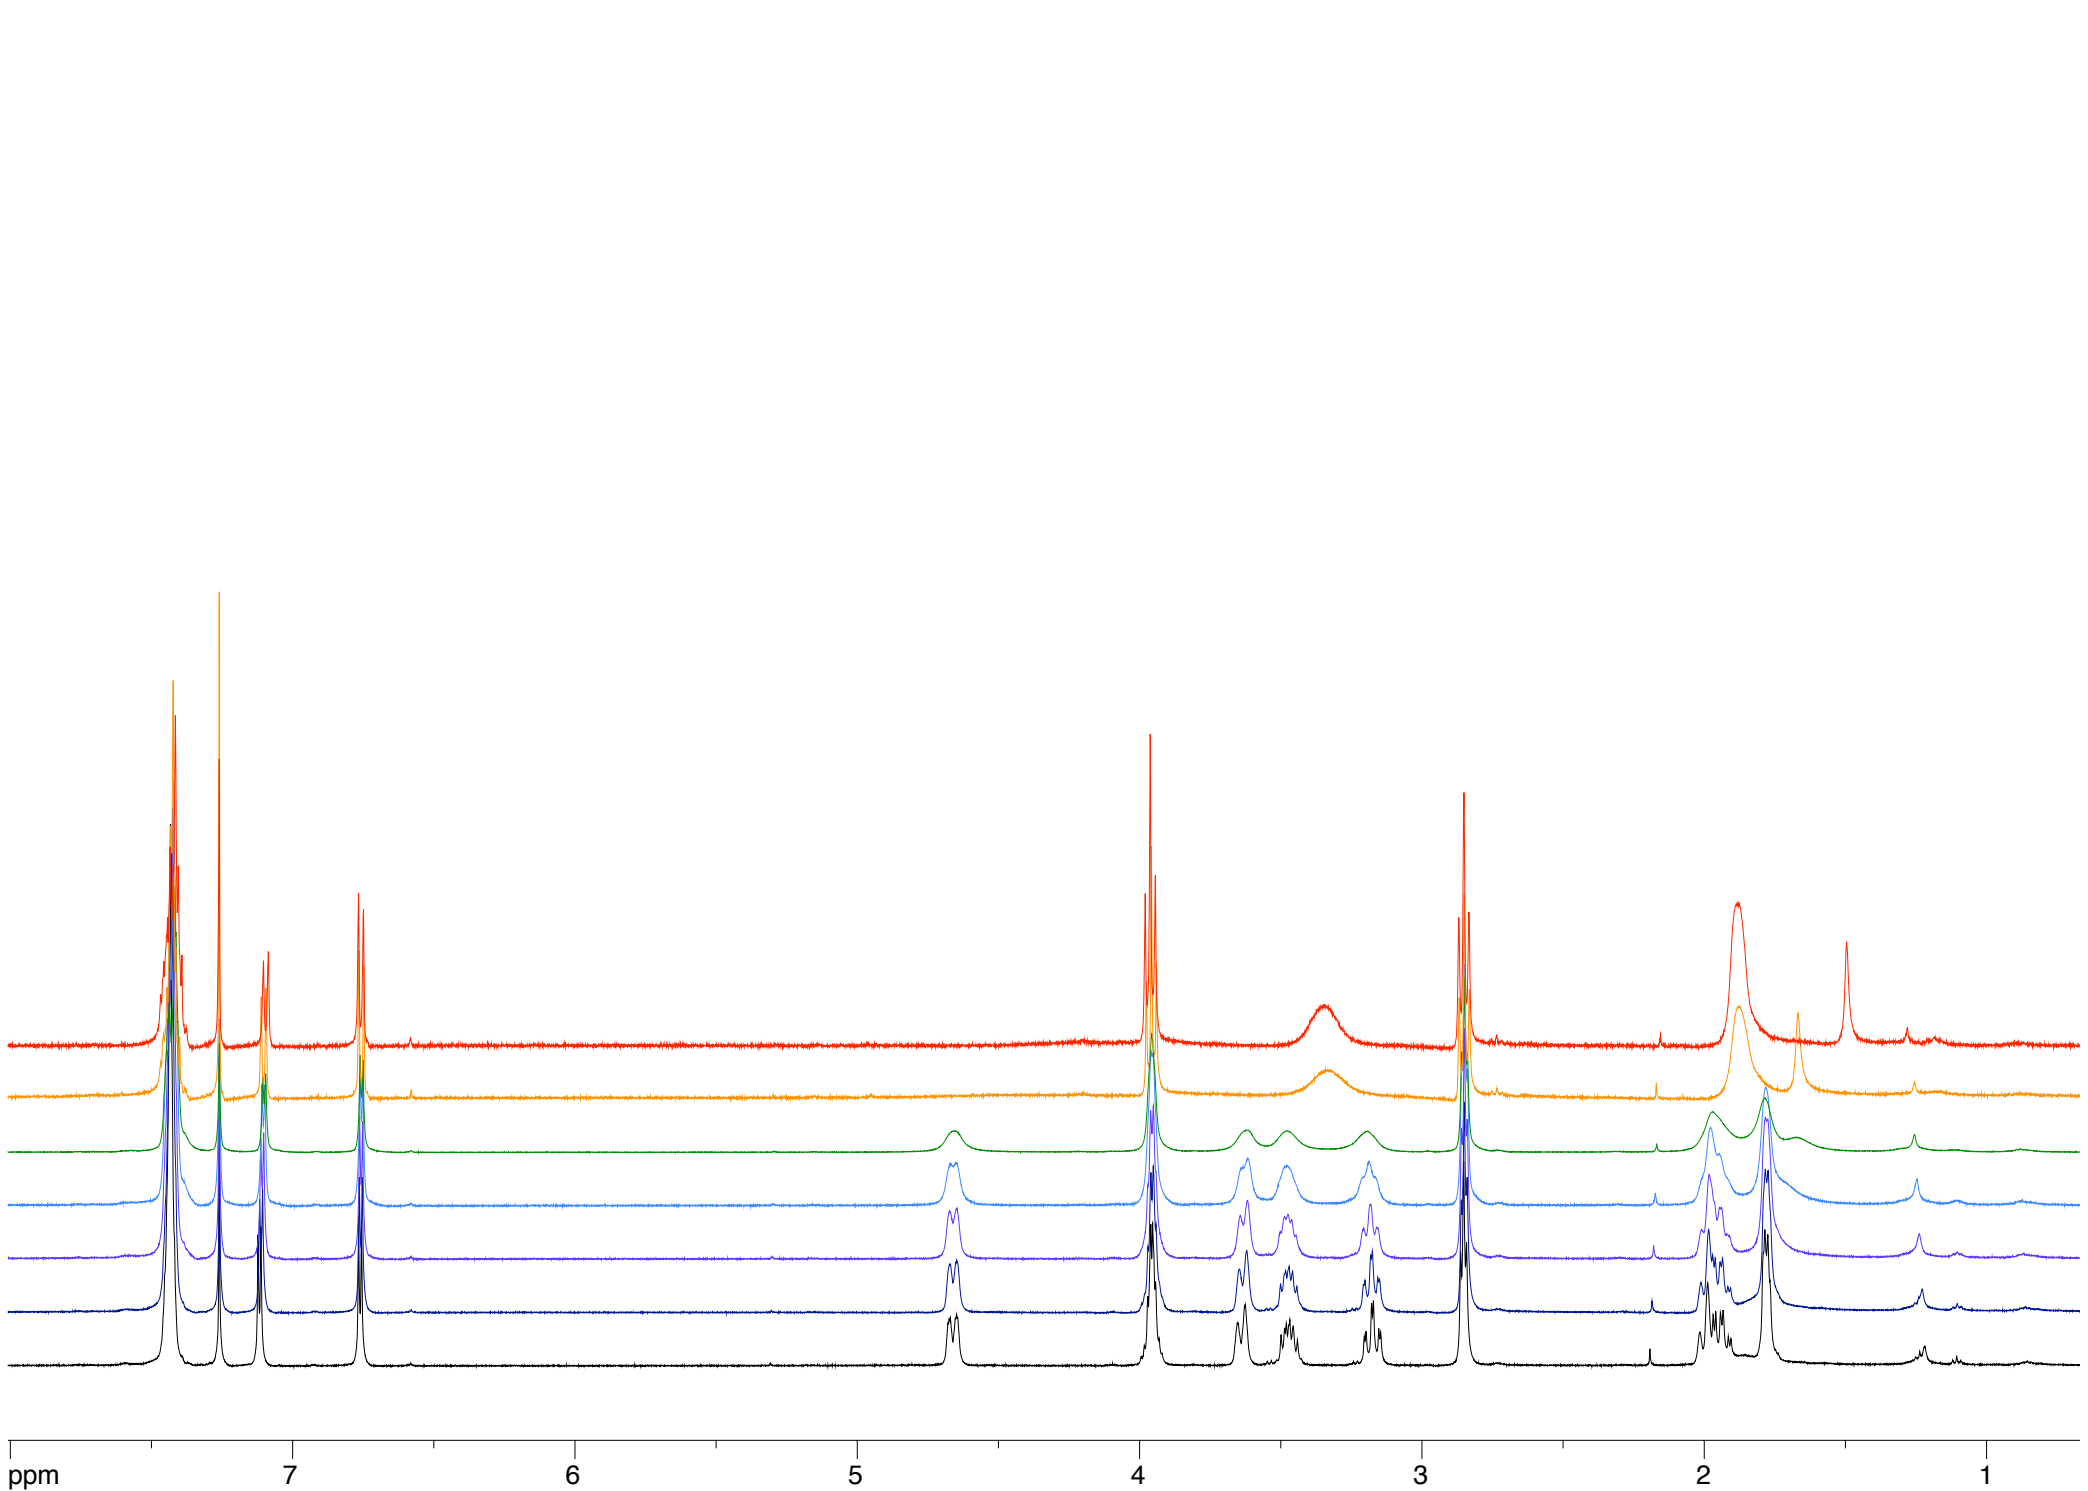

Supplement: S43 (10.1371/journal.pone.0111782.s043) [file journal.pone.0111782.s043]
